# Supplementary material
Source: HighWire-hosted journal article supplement (https://www.jswconline.org/highwire/filestream/5229/field_highwire_adjunct_files/0/JSWC_00131_Supplemental.docx)
Supplement: JSWC_00131_Supplemental.docx [file JSWC_00131_Supplemental.docx]

**Citation:** Xiao, L., Y. Huang, J. Zhao, and J. Zhou. 2021. Crop type drives soil bacterial community and functional structure on the Loess Plateau terraces of China. Journal of Soil and Water Conservation 76(4). <https://doi.org/10.2489/jswc.2021.00131>.

Supplementary Table A1

Soil physicochemical properties

|  | AL | GH | AF | PF | IC | CF |
| --- | --- | --- | --- | --- | --- | --- |
| pH | 8.78 ± 0.02a | 8.68 ± 0.10a | 8.40 ± 0.28a | 8.77 ± 0.06a | 8.39 ± 0.24a | 8.67 ± 0.10a |
| BD g cm3 | 1.21 ± 0.07b | 1.33 ± 0.04a | 1.29 ± 0.04b | 1.20 ± 0.05b | 1.21 ± 0.10b | 1.31 ± 0.07ab |
| SOC g kg-1 | 2.90 ± 0.34d | 6.50 ± 0.07a | 3.77 ± 0.30c | 3.48 ± 0.34c | 4.84 ± 0.06b | 3.04 ± 0.27d |
| TN g kg-1 | 0.31 ± 0.06c | 0.76 ± 0.02a | 0.60 ± 0.15b | 0.39 ± 0.09c | 0.54 ± 0.04b | 0.35 ± 0.03c |
| TP g kg-1 | 0.52 ± 0.01c | 0.86 ± 0.12a | 0.65 ± 0.04b | 0.61 ± 0.06b | 0.68 ± 0.05b | 0.65 ± 0.06b |
| NO3-N mg kg-1 | 1.45 ± 0.56e | 16.32 ± 0.80c | 46.78 ± 2.31a | 18.21 ± 1.84c | 36.82 ± 2.77b | 8.14 ± 0.74d |
| NH4-N mg kg-1 | 9.65 ± 1.37b | 11.28 ± 1.13a | 10.22 ± 1.21b | 1.75 ± 0.10c | 13.18 ± 1.72a | 2.31 ± 0.41c |
| AP mg kg-1 | 1.36 ± 0.09d | 20.82 ± 1.61a | 11.98 ± 1.69b | 6.52 ± 1.05c | 11.05 ± 1.37b | 3.12 ± 0.17d |
| C/N | 9.15 ± 0.54a | 8.56 ± 0.15ab | 6.58 ± 1.52b | 9.28 ± 2.28a | 9.15 ± 0.53a | 8.46 ± 1.06ab |
| MS | 0.11 ± 0.02b | 0.19 ± 0.02a | 0.17 ± 0.02a | 0.13 ± 0.06ab | 0.14 ± 0.02ab | 0.15 ± 0.02ab |
| MBN | 3.62 ± 0.50d | 4.56 ± 0.40d | 6.18 ± 0.30c | 7.27 ± 0.50b | 8.69 ± 0.65a | 4.54 ± 0.70d |

Note: NO3-N: nitrate N; NH4-N: ammonia N; SOC: soil organic C; TN: total N; TP: total P; AP: available P; BD: bulk density; MS: moisture; MBN: microbial biomass N; different small letters represented the significant difference among different plant types (*p* < 0.05), the same below.

Supplementary Table A2

Class label in the figure of co-occurrence interactions

| Label | Class | Label | Class | Label | Class | Label | Class |
| --- | --- | --- | --- | --- | --- | --- | --- |
| G1 | *Acidobacteria* | G14 | *Planctomycetacia* | G27 | *Spartobacteria* | G40 | *Ignavibacteria* |
| G2 | *Actinobacteria* | G15 | KD4-96 | G28 | *Deinococci* | G41 | BD7-11 |
| G3 | *Betaproteobacteria* | G16 | *Thermomicrobia* | G29 | Marine_Group_I | G42 | *Candidatus_Magasanikbacteria* |
| G4 | *Alphaproteobacteria* | G17 | *Phycisphaerae* | G30 | *Fibrobacteria* | G43 | vadinHA49 |
| G5 | *Unclassified* | G18 | *Bacilli* | G31 | *Chthonomonadetes* | G44 | Pla3_lineage |
| G6 | *Gemmatimonadetes* | G19 | OPB35_soil_group | G32 | *Ktedonobacteria* | G45 | *Armatimonadia* |
| G7 | *Gammaproteobacteria* | G20 | *Thermoplasmata* | G33 | *Clostridia* | G46 | *Chlamydiae* |
| G8 | *Deltaproteobacteria* | G21 | *Cyanobacteria* | G34 | *Ardenticatenia* | G47 | *Chlorobia* |
| G9 | *Nitrospira* | G22 | *Opitutae* | G35 | Pla4_lineage | G48 | *Spirochaetes* |
| G10 | *Sphingobacteriia* | G23 | S085 | G36 | *Caldilineae* | G49 | Deep_Sea_Euryarchaeotic_Group(DSEG) |
| G11 | *Cytophagia* | G24 | *Elusimicrobia* | G37 | *Fimbriimonadia* | G50 | *Candidatus_Levybacteria* |
| G12 | *Anaerolineae* | G25 | TK10 | G38 | *Flavobacteriia* | G51 | *Candidatus_Peribacteria* |
| G13 | *Soil_Crenarchaeotic_Group (SCG)* | G26 | OM190 | G39 | JG30-KF-CM66 | G52 | SAR202_clade |
